# Supplementary material
Source: publisher site journal article supplement (https://www.dovepress.com/article/399910)
Supplement: Supplementary file 1 [file get_supplementary_file.php]

Table S1 Relationship between thyroid hormone sensitivity and DR

| Exposure | Non (OR, 95% CI, P) | Adjust I (OR, 95% CI, P) | Adjust II (OR, 95% CI, P) |
| --- | --- | --- | --- |
| TSHI | 0.9 (0.6, 1.2) 0.449 | 0.9 (0.7, 1.3) 0.629 | 0.8 (0.2, 3.2) 0.788 |
| TSHI (tertile) |  |  |  |
| T1 | Ref | Ref | Ref |
| T2 | 0.9 (0.6, 1.4) 0.648 | 0.9 (0.6, 1.4) 0.576 | 0.9 (0.5, 1.9) 0.882 |
| T3 | 0.9 (0.6, 1.4) 0.608 | 0.9 (0.6, 1.5) 0.792 | 1.3 (0.4, 3.9) 0.657 |
| P for trend | 0.609 | 0.790 | 0.663 |
| TT4RI | 1.0 (1.0, 1.0) 0.898 | 1.0 (1.0, 1.0) 0.928 | 1.0 (0.9, 1.1) 0.571 |
| TT4RI (tertile) |  |  |  |
| T1 | Ref | Ref | Ref |
| T2 | 0.9 (0.6, 1.4) 0.588 | 0.9 (0.6, 1.4) 0.684 | 1.1 (0.5, 2.2) 0.865 |
| T3 | 1.1 (0.7, 1.7) 0.801 | 1.0 (0.7, 1.6) 0.882 | 1.3 (0.4, 4.6) 0.664 |
| P for trend | 0.798 | 0.880 | 0.686 |
| TFQI | 0.7 (0.5, 1.2) 0.226 | 0.8 (0.5, 1.3) 0.387 | 2.8 (0.1, 87.6) 0.562 |
| TFQI (tertile) |  |  |  |
| T1 | Ref | Ref | Ref |
| T2 | 0.9 (0.6, 1.5) 0.771 | 0.9 (0.6, 1.4) 0.693 | 1.0 (0.5, 2.0) 0.992 |
| T3 | 0.8 (0.5, 1.2) 0.247 | 0.8 (0.5, 1.3) 0.388 | 1.0 (0.3, 2.9) 0.983 |
| P for trend | 0.248 | 0.388 | 0.984 |

Non-adjusted model adjust for: None 
Adjust I model adjust for: Sex; Age

Adjust II model adjust for: Sex; Age (Smooth); BMI (kg/m2); Duration of diabetes(Smooth); Smoking; Drinking; Hypertension; TC; TG; LDL-C; HDL-C; HbA1c; TSH; FT3; FT4(Smooth) .

Table S2 Relationship between thyroid hormone and DR

| Exposure | Non (OR, 95% CI, P) | Adjust I (OR, 95% CI, P) | Adjust II (OR, 95% CI, P) |
| --- | --- | --- | --- |
| TSH | 1.1 (0.9, 1.3) 0.336 | 1.1 (0.9, 1.3) 0.576 | 1.0 (0.8, 1.3) 0.657 |
| TSH (tertile) |  |  |  |
| T1 | Ref | Ref | Ref |
| T2 | 1.0 (0.7, 1.6) 0.909 | 1.0 (0.7, 1.6) 0.915 | 1.2 (0.6, 2.4) 0.630 |
| T3 | 1.2 (0.8, 1.9) 0.452 | 1.1 (0.7, 1.7) 0.692 | 1.3 (0.4, 4.4) 0.711 |
| P for trend | 0.451 | 0.692 | 0.670 |
| FT3 | 0.8 (0.6, 1.0) 0.052 | 0.9 (0.7, 1.1) 0.320 | 1.1 (0.8, 1.4) 0.756 |
| FT3 (tertile) |  |  |  |
| T1 | Ref | Ref | Ref |
| T2 | 0.8 (0.5, 1.2) 0.247 | 0.8 (0.5, 1.3) 0.382 | 0.7 (0.4, 1.3) 0.269 |
| T3 | 0.7 (0.4, 1.0) 0.058 | 0.8 (0.5, 1.2) 0.265 | 0.8 (0.3, 2.2) 0.728 |
| P for trend | 0.057 | 0.261 | 0.705 |
| FT4 | 0.9 (0.8, 1.0) 0.010 | 0.9 (0.9, 1.0) 0.046 | 0.9 (0.8, 1.0) 0.031 |
| FT4 (tertile) |  |  |  |
| T1 | Ref | Ref | Ref |
| T2 | 0.9 (0.6, 1.4) 0.657 | 0.9 (0.6, 1.5) 0.813 | 1.4 (0.7, 2.8) 0.371 |
| T3 | 0.6 (0.4, 0.9) 0.023 | 0.7 (0.4, 1.1) 0.086 | 1.3 (0.4, 4.0) 0.668 |
| P for trend | 0.023 | 0.089 | 0.649 |

Non-adjusted model adjust for: None 
Adjust I model adjust for: Sex; Age
Adjust II model adjust for: Sex; Age; BMI; Duration of diabetes; Smoking; Drinking; Hypertension; HbA1c; TSH; FT3; FT4; TC; TG; LDL-C; HDL-C.

Table S3 Relationship between FT4 and DR using Fitting model by two-piecewise linear regression

| Exposure: | TSH | FT3 | FT4 |
| --- | --- | --- | --- |
| Fitting model by standard linear regression | 1.07 (0.85, 1.34) 0.58 | 1.16 (0.81, 1.66) 0.40 | 0.90 (0.82, 0.99) 0.03 |
| Fitting model by two-piecewise linear regression |  |  |  |
| Inflection point of thyroid hormone Index | 2.61 | 5.76 | 20.08 |
| < Inflection point | 0.89 (0.60, 1.31) 0.54 | 1.28 (0.86, 1.90) 0.22 | 0.99 (0.88, 1.11) 0.89 |
| > Inflection point | 1.54 (0.78, 3.06) 0.21 | 0.23 (0.01, 5.01) 0.35 | 0.30 (0.13, 0.67) 0.003 |
| Log likelihood ratio | 0.259 | 0.256 | 0.003 |

Adjust for: Sex; Age; BMI; Duration of diabetes; Smoking; Drinking; Hypertension; HbA1c; TSH; FT3; FT4; TC; TG; LDL-C; HDL-C.


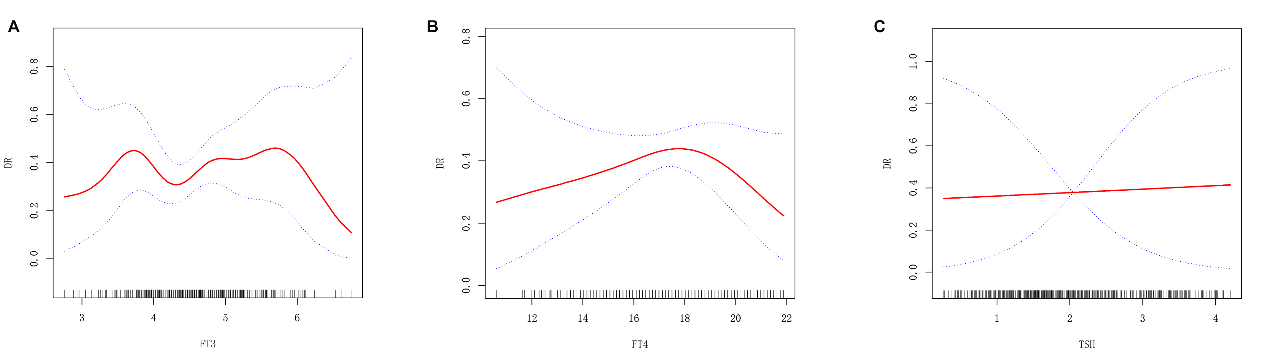


**Figure S1** The association between thyroid hormone levels and the prevalence of DR in euthyroid patients with T2DM. (A) FT3 and DR; (B) FT4 and DR; (C) TSH and DR. The solid and dashed lines represent the estimated values and their corresponding 95% confidence interval. The adjustment factors included Sex, Age, BMI, Duration of diabetes, HbA1c, HDL-C, FT3, and FT4.
